# Supplementary material for: Carbon mineralization pathways and bioturbation in coastal Brazilian sediments
Source: Springer Nature journal article supplement (doi:10.1038/srep16122), 2015-11-03
Supplement: 41598_2015_BFsrep16122_MOESM1_ESM.pdf [file 41598_2015_BFsrep16122_MOESM1_ESM.pdf]

Supplementary information

## **Carbon mineralization pathways and bioturbation in coastal Brazilian sediments**

Cintia O. Quintana<sup>1,2\*</sup>, Maurício Shimabukuro<sup>1</sup>, Camila O. Pereira<sup>1</sup>, Betina G. R. Alves<sup>1</sup>, Paula C. Moraes<sup>1</sup>, Thomas Valdemarsen<sup>2</sup>, Erik Kristensen<sup>2</sup>, Paulo Y. G. Sumida<sup>1</sup>

1. Instituto Oceanográfico da Universidade de São Paulo, Praça do Oceanográfico, 191, Cidade Universitária, 05508-120, São Paulo, Brazil

2. Department of Biology, University of Southern Denmark, Campusvej 55, Odense M, 5230, Denmark

\* Corresponding author: [cintiaorgano@gmail.com](mailto:cintiaorgano@gmail.com)

Table S1: Summary of statistical analysis from variables with significant differences. Letters “a”, “b” and “c” represent significant difference within the factors “time” and “station” observed in Tukey post hoc tests.

| <b>Two-way ANOVA</b>              | <b>F</b>                   | <b>p</b> | <b>Tukey test</b> |          |      |      |      |
|-----------------------------------|----------------------------|----------|-------------------|----------|------|------|------|
|                                   |                            |          | September         | February | St 5 | St 6 | St 7 |
| <b>Bottom water O<sub>2</sub></b> |                            |          |                   |          |      |      |      |
| Time                              | F <sub>1,16</sub> = 393.77 | <0.001   | a                 | b        |      |      |      |
| Station                           | F <sub>1,16</sub> = 0.70   | 0.515    |                   |          |      |      |      |
| Time X Station                    | F <sub>1,16</sub> = 0.90   | 0.431    |                   |          |      |      |      |
| <b>Sediment Chlorophyll-a</b>     |                            |          |                   |          |      |      |      |
| Time                              | F <sub>1,16</sub> = 19.36  | 0.001    | a                 | b        | a    | b    | bc   |
| Station                           | F <sub>1,16</sub> = 13.11  | 0.001    |                   |          |      |      |      |
| Time X Station                    | F <sub>1,16</sub> = 6.69   | 0.013    |                   |          |      |      |      |
| <b>Sediment Phaeopigments</b>     |                            |          |                   |          |      |      |      |
| Time                              | F <sub>1,16</sub> = 21.33  | <0.001   | a                 | b        |      |      |      |
| Station                           | F <sub>1,16</sub> = 1.06   | 0.380    |                   |          |      |      |      |
| Time X Station                    | F <sub>1,16</sub> = 2.41   | 0.136    |                   |          |      |      |      |
| <b>TCO<sub>2</sub> efflux</b>     |                            |          |                   |          |      |      |      |
| Time                              | F <sub>1,56</sub> = 31.61  | <0.001   | a                 | b        |      |      |      |
| Station                           | F <sub>1,56</sub> = 0.53   | 0.591    |                   |          |      |      |      |
| Time X Station                    | F <sub>1,56</sub> = 1.98   | 0.149    |                   |          |      |      |      |
| <b>O<sub>2</sub> flux</b>         |                            |          |                   |          |      |      |      |
| Time                              | F <sub>1,56</sub> = 319.05 | <0.001   | a                 | b        |      |      |      |
| Station                           | F <sub>1,56</sub> = 1.17   | 0.316    |                   |          |      |      |      |
| Time X Station                    | F <sub>1,56</sub> = 1.34   | 0.270    |                   |          |      |      |      |
| <b>NO<sub>x</sub> flux</b>        |                            |          |                   |          |      |      |      |
| Time                              | F <sub>1,36</sub> = 118.17 | <0.001   | a                 | b        | a    | b    | a    |
| Station                           | F <sub>1,36</sub> = 7.66   | 0.002    |                   |          |      |      |      |
| Time X Station                    | F <sub>1,36</sub> = 1.36   | 0.272    |                   |          |      |      |      |

Continuation of Table S1

| Two-way ANOVA                    | F                  | p      | Tukey test |          |                |
|----------------------------------|--------------------|--------|------------|----------|----------------|
|                                  |                    |        | September  | February | St 5 St 6 St 7 |
| <b>Macrofaunal abundance</b>     |                    |        |            |          |                |
| Time                             | $F_{1,17} = 48.55$ | <0.001 | a          | b        |                |
| Station                          | $F_{1,17} = 0.60$  | 0.563  |            |          |                |
| Time X Station                   | $F_{1,17} = 1.05$  | 0.379  |            |          |                |
| <b>Macrofaunal biomass</b>       |                    |        |            |          |                |
| Time                             | $F_{1,17} = 6.28$  | 0.028  | a          | b        |                |
| Station                          | $F_{1,17} = 0.85$  | 0.453  |            |          |                |
| Time X Station                   | $F_{1,17} = 3.47$  | 0.065  |            |          |                |
| <b>Macrofaunal bioirrigation</b> |                    |        |            |          |                |
| Time                             | $F_{1,15} = 13.57$ | 0.004  | a          | b        |                |
| Station                          | $F_{1,15} = 0.63$  | 0.555  |            |          |                |
| Time X Station                   | $F_{1,15} = 1.38$  | 0.296  |            |          |                |
| <b>Surface diffusors</b>         |                    |        |            |          |                |
| Time                             | $F_{1,17} = 11.84$ | 0.005  | a          | b        |                |
| Station                          | $F_{1,17} = 0.75$  | 0.493  |            |          |                |
| Time X Station                   | $F_{1,17} = 1.05$  | 0.381  |            |          |                |
| <b>Gallery diffusors</b>         |                    |        |            |          |                |
| Time                             | $F_{1,17} = 17.80$ | 0.001  | a          | b        |                |
| Station                          | $F_{1,17} = 0.13$  | 0.88   |            |          |                |
| Time X Station                   | $F_{1,17} = 0.13$  | 0.88   |            |          |                |
| <b>Epifaunal diffusors</b>       |                    |        |            |          |                |
| Time                             | $F_{1,17} = 17.80$ | 0.001  | a          | b        |                |
| Station                          | $F_{1,17} = 0.13$  | 0.88   |            |          |                |
| Time X Station                   | $F_{1,17} = 0.13$  | 0.88   |            |          |                |

Table S2: Stoichiometry of carbon and nitrogen in porewater and jars and N mineralization processes at St 5, St 6 and St 7 during September 2012 and February 2014.

|                                                                                          | St 5 | St 6 | St 7 |
|------------------------------------------------------------------------------------------|------|------|------|
| <b>C:N in porewater</b>                                                                  |      |      |      |
| September 2012                                                                           | 7.2  | 7.8  | 5.5  |
| February 2014                                                                            | 6.0  | 7.3  | 8.8  |
| <b>C:N in jars*</b>                                                                      |      |      |      |
| September 2012                                                                           | 8.2  | 8.5  | 7.7  |
| February 2014                                                                            | 6.4  | 7.7  | 9.4  |
| <b>Total N mineralization (mmol m<sup>-2</sup> d<sup>-1</sup>)</b>                       |      |      |      |
| September 2012                                                                           | 2.4  | 1.3  | 2.3  |
| February 2014                                                                            | 3.6  | 3.2  | 2.4  |
| <b>NH<sub>4</sub><sup>+</sup> production jars * (mmol m<sup>-2</sup> d<sup>-1</sup>)</b> |      |      |      |
| September 2012                                                                           | 3.0  | 1.4  | 2.8  |
| February 2014                                                                            | 1.8  | 1.1  | 2.4  |
| <b>Nitrification (mmol m<sup>-2</sup> d<sup>-1</sup>)</b>                                |      |      |      |
| September 2012                                                                           | 2.5  | 1.8  | 3.5  |
| February 2014                                                                            | 2.5  | 2.0  | 0.9  |
| <b>Denitrification (mmol m<sup>-2</sup> d<sup>-1</sup>)</b>                              |      |      |      |
| September 2012                                                                           | 3.1  | 2.2  | 3.9  |
| February 2014                                                                            | 2.6  | 1.8  | 1.0  |

\* Corrected for NH<sub>4</sub><sup>+</sup> adsorption. C:N in porewater was determined by the slope of linear regression between TCO<sub>2</sub> and NH<sub>4</sub><sup>+</sup> in the upper 10 cm of the sediment. Total N mineralization was determined by dividing the TCO<sub>2</sub> effluxes with the C:N in jars. Nitrification was estimated by subtracting NH<sub>4</sub><sup>+</sup> fluxes from the total N mineralization. Denitrification was estimated by nitrification minus NO<sub>x</sub><sup>-</sup> fluxes.
